# Supplementary material for: Biomass-derived O, N-codoped hierarchically porous carbon prepared by black fungus and Hericium erinaceus for high performance supercapacitor
Source: Royal Society of Chemistry journal article supplement (doi:10.1039/d1ra03699h), 2021-01-01
Supplement: d1ra03699h1.pdf [file d1ra03699h1.pdf]

## Supplementary Information

### **Biomass-derived O, N-codoped 3D porous carbon prepared by black fungus and hericium erinaceus for high performance supercapacitor**

Xinxian Zhong,<sup>a</sup> Quanyuan Mao,<sup>a</sup> Zesheng Li,<sup>b</sup> Zhigao Wu,<sup>c</sup> YataoXie,<sup>d</sup> Shu-Hui Li,<sup>\*a</sup> Guichao Liang<sup>a</sup>  
and Hongqiang Wang<sup>\*a</sup>

<sup>a</sup> *State Key Laboratory for the Chemistry and Molecular Engineering of Medicinal Resources, Guangxi Key Laboratory of Low Carbon Energy Materials, School of Chemistry and Pharmaceutical Sciences, Guangxi Normal University, Guilin, 541004, China. E-mail: gxnulsh@gxnu.edu.cn; E-mail: whq74@mailbox.gxnu.edu.cn*

<sup>b</sup> *College of Chemistry, Guangdong University of Petrochemical Technology, Maoming, 525000, China*

<sup>c</sup> *Guangxi Vocational and Technical Institute of Industry, Nanning, 530005, China*

<sup>d</sup> *School of Materials Science and Engineering, Ocean University of China, Qingdao, 266100, China*

## **Experimental Materials**

The raw materials (e.g. black fungus and hericium erinaceus) were purchased from Guangxi province, China. Distilled water, ethanol (95 %), potassium hydroxide (KOH) and concentrated hydrochloric acid (HCl) were obtained commercially.

## **Structural characterization**

The morphologies of prepared carbon materials were observed by field emission environmental scanning electron microscopy (FEI Quanta 200 FEG), Raman spectra were recorded by Raman spectrometer (in Via), and the composition and structure of materials were recorded by X-ray powder diffractometer (Rigaku D/max 2500 v/pc). The BET (Brunauer-Emmett-Teller) surface area of these prepared carbon materials was obtained by using the BET equation with Quantachrome Instruments, and the pore size distribution of materials was analyzed by Density Functional Theory (DFT) method.

## **Electrochemical measurement**

The electrochemical performance was measured under two-electrode configuration with 6.0 M KOH as electrolyte. Cyclic voltammetry (CV) curves and galvanostatic charge-discharge (GCD) curves were recorded by using electrochemical working station (CHI 690E, Shanghai, China) except the GCD curves of cycle life were investigated on LAND (Wuhan LAND, China). Electrochemical impedance spectroscopy (EIS) was measured at 100 kHz ~ 10 mHz with an amplitude of 5 mV.

**Table S1.** Specific surface area and pore volume of FAC<sub>X</sub> and HAC<sub>X</sub> samples.

| Sample           | $S_{\text{BET}}^{\text{a}}$<br>(m <sup>2</sup> g <sup>-1</sup> ) | $S_{\text{micro}}^{\text{b}}$<br>(m <sup>2</sup> g <sup>-1</sup> ) | $S_{\text{meso}}^{\text{c}}$<br>(m <sup>2</sup> g <sup>-1</sup> ) | $V_{\text{total}}^{\text{d}}$<br>(cm <sup>3</sup> g <sup>-1</sup> ) | $V_{\text{micro}}^{\text{e}}$<br>(cm <sup>3</sup> g <sup>-1</sup> ) | $V_{\text{meso}}^{\text{f}}$<br>(cm <sup>3</sup> g <sup>-1</sup> ) | Average pore diameter<br>(nm) |
|------------------|------------------------------------------------------------------|--------------------------------------------------------------------|-------------------------------------------------------------------|---------------------------------------------------------------------|---------------------------------------------------------------------|--------------------------------------------------------------------|-------------------------------|
| FAC <sub>1</sub> | 363.5                                                            | 319.5                                                              | 44.0                                                              | 0.177                                                               | 0.141                                                               | 0.036                                                              | 0.889                         |
| FAC <sub>2</sub> | 1227.3                                                           | 1083.8                                                             | 143.5                                                             | 0.451                                                               | 0.386                                                               | 0.065                                                              | 1.278                         |
| FAC <sub>3</sub> | 1501.6                                                           | 1132.0                                                             | 369.6                                                             | 0.621                                                               | 0.402                                                               | 0.219                                                              | 1.332                         |
| HAC <sub>1</sub> | 957.2                                                            | 879.1                                                              | 78.1                                                              | 0.423                                                               | 0.312                                                               | 0.111                                                              | 1.030                         |
| HAC <sub>2</sub> | 1362.0                                                           | 1154.3                                                             | 207.7                                                             | 0.523                                                               | 0.410                                                               | 0.113                                                              | 1.186                         |
| HAC <sub>3</sub> | 1667.5                                                           | 1248.6                                                             | 418.9                                                             | 0.652                                                               | 0.447                                                               | 0.205                                                              | 1.352                         |

<sup>a</sup> Specific surface area calculated by BET method.

<sup>b</sup> Micropore surface area based on t-plot method.

<sup>c</sup>  $S_{\text{meso}} = S_{\text{BET}} - S_{\text{micro}}$ .

<sup>d</sup> Total pore volume at  $P/P_0 = 0.99$ .

<sup>e</sup> Micropore pore volume from t-plot method.

<sup>f</sup>  $V_{\text{meso}} = V_{\text{total}} - V_{\text{micro}}$ .

**Table S2.** Comparison of the specific capacitance of biomass-based carbon materials at different test conditions.

| Biomass materials   | Activation agent             | BET ( $\text{m}^2 \text{g}^{-1}$ ) | Specific capacitance ( $\text{F g}^{-1}$ ) / test system | GCD measurement          | Electrolyte                 | Reference |
|---------------------|------------------------------|------------------------------------|----------------------------------------------------------|--------------------------|-----------------------------|-----------|
| Rapeseed dregs      | $\text{ZnCl}_2$              | 1417                               | 170.5 / three-electrode                                  | $5 \text{ mV s}^{-1}$    | 1 M $\text{H}_2\text{SO}_4$ | 1         |
| Loofah sponge       | KOH                          | 2718                               | 309.6 / three-electrode                                  | $1000 \text{ mA g}^{-1}$ | 6 M KOH                     | 2         |
| Mushroom (Shiitake) | $\text{H}_3\text{PO}_4$ -KOH | 2988                               | 238 / two-electrode                                      | $200 \text{ mA g}^{-1}$  | 6 M KOH                     | 3         |
| Bamboo char         | KOH                          | 1732                               | 222 / two-electrode                                      | $500 \text{ mA g}^{-1}$  | 6 M KOH                     | 4         |
| Corn grain          | KOH                          | 3199                               | 257 / two-electrode                                      | $50 \text{ mV s}^{-1}$   | 6 M KOH                     | 5         |
| Rice husk           | $\text{ZnCl}_2$              | 1527                               | 245 / two-electrode                                      | $50 \text{ mA g}^{-1}$   | 6 M KOH                     | 6         |
| Osmanthus flower    | KOH                          | 1463                               | 255 / three-electrode                                    | $1000 \text{ mA g}^{-1}$ | 6 M KOH                     | 7         |
| Peanut shell        | $\text{ZnCl}_2$              | 1552                               | 184 / two-electrode                                      | $50 \text{ mA g}^{-1}$   | 6 M KOH                     | 8         |
| comcob              | KOH                          | 64.8                               | 247 / two-electrode                                      | $500 \text{ mA g}^{-1}$  | 6 M KOH                     | 9         |
| Silkworm            | self activation              | 2523                               | 235 / two-electrode                                      | $1000 \text{ mA g}^{-1}$ | 6 M KOH                     | 10        |
| Black fungus        | KOH                          | 1227                               | 209.3 / two-electrode                                    | $1000 \text{ mA g}^{-1}$ | 6 M KOH                     | This work |
| Heridium erinaceus  | KOH                          | 1362                               | 238.6 / two-electrode                                    | $1000 \text{ mA g}^{-1}$ | 6 M KOH                     | This work |

**Table S3.** Comparison of the energy density and power density of biomass-based carbon materials.

| Biomass materials   | Energy density (Wh kg <sup>-1</sup> ) | Power density (W kg <sup>-1</sup> ) | Reference |
|---------------------|---------------------------------------|-------------------------------------|-----------|
| Mushroom (Shiitake) | 8.2                                   | 100                                 | 3         |
| Bamboo char         | 6.68                                  | 100.2                               | 4         |
| Rice husk           | 8.36                                  | 59.8                                | 6         |
| comcob              | 8.9                                   | 128.2                               | 9         |
| Silkworm            | 7.9                                   | 234                                 | 10        |
| Large AC/AC         | 3.96                                  | 100                                 | 11        |
| Walnut shell        | 7.97                                  | 180.8                               | 12        |
| Black fungus        | 7.3                                   | 250                                 | This work |
| Hericiium erinaceus | 8.3                                   | 250                                 | This work |

AC, activated, microporous carbon.

## Reference

- 1 X. Kang, H. Zhu, C. Wang, K. Sun and J. Yin, *J. Colloid Interf. Sci.*, 2018, **509**, 369-383.
- 2 X.-L. Su, J.-R. Chen, G.-P. Zheng, J.-H. Yang, X.-X. Guan, P. Liu and X.-C. Zheng, *Appl. Surf. Sci.*, 2018, **436**, 327-336.
- 3 P. Cheng, S. Gao, P. Zang, X. Yang, Y. Bai, H. Xu, Z. Liu and Z. Lei, *Carbon*, 2015, **93**, 315-324.
- 4 Y. Gong, D. Li, C. Luo, Q. Fu and C. Pan, *Green Chem.*, 2017, **19**, 4132-4140.
- 5 M. S. Balathanigaimani, W.-G. Shim, M.-J. Lee, C. Kim, J.-W. Lee and H. Moon, *Electrochem. Commun.*, 2008, **10**, 868-871.
- 6 X. He, P. Ling, M. Yu, X. Wang, X. Zhang and M. Zheng, *Electrochim. Acta*, 2013, **105**, 635-641.
- 7 R. Zou, H. Quan, W. Wang, W. Gao, Y. Dong and D. Chen, *J. Environ. Chem. Eng.*, 2018, **6**, 258-265.
- 8 X. He, R. Li, J. Han, M. Yu and M. Wu, *Mater. Lett.*, 2013, **94**, 158-160.
- 9 M. Xu, Q. Huang, J. Lu and J. Niu, *Ind. Crops Prod.*, 2021, **161**, 113215.
- 10 C. Gong, X. Wang, D. Ma, H. Chen, S. Zhang and Z. Liao, *Electrochim. Acta*, 2016, **220**, 331-339.
- 11 A. Burke, *Electrochim. Acta*, 2007, **53**, 1083-1091.
- 12 H.-h. Fu, L. Chen, H. Gao, X. Yu, J. Hou, G. Wang, F. Yu, H. Li, C. Fan, Y.-l. Shi and X. Guo, *Int. J. Hydrogen Energy*, 2020, **45**, 443-451.
